# Supplementary material for: Production, Characterization, and Antioxidant Activities of an Exopolysaccharide Extracted from Spent Media Wastewater after Leuconostoc mesenteroides WiKim32 Fermentation
Source: PubMed Central journal article supplement — ACS Omega. 2021 Mar 18;6(12):8171–8. doi: 10.1021/acsomega.0c06095 (PMC8014919; doi:10.1021/acsomega.0c06095), 2021-03-18
Supplement: ao0c06095_si_001.pdf [file ao0c06095_si_001.pdf]

Supporting Information

**Production, characterization, and antioxidant activities of  
exopolysaccharide extracted from spent media wastewater after  
*Leuconostoc mensenteroides* WiKim32 fermentation**

In Seong Choi<sup>a,b</sup>, Seung Hee Ko<sup>a,b</sup>, Mo Eun Lee<sup>a</sup>, Ho Myeong Kim<sup>a</sup>, Jung Eun Yang<sup>a</sup>, Seul-Gi Jeong<sup>a</sup>, Kwang Ho Lee<sup>c</sup>, Ji Yoon Chang<sup>a</sup>, Jin-Cheol Kim<sup>d</sup> and Hae Woong Park<sup>a,\*</sup>

<sup>a</sup>R&D Division, World Institute of Kimchi, Gwangju, 61755, Republic of Korea

<sup>b</sup>Public CMO for Microbial – based Vaccine, Hwasun-gun, Jeollanam-do, 58141, Republic of Korea

<sup>c</sup>Center for Research Facilities, Chonnam National University, Gwangju, 61186, Republic of Korea

<sup>d</sup>Department of Agricultural Chemistry, Institute of Environmentally Friendly Agriculture, College of Agriculture and Life Science, Chonnam National University, Gwangju 61186, Republic of Korea

\* Corresponding author at: Advanced Process Technology Fermentation Research Group, R&D Division, World Institute of Kimchi, Gwangju 61755, Republic of Korea

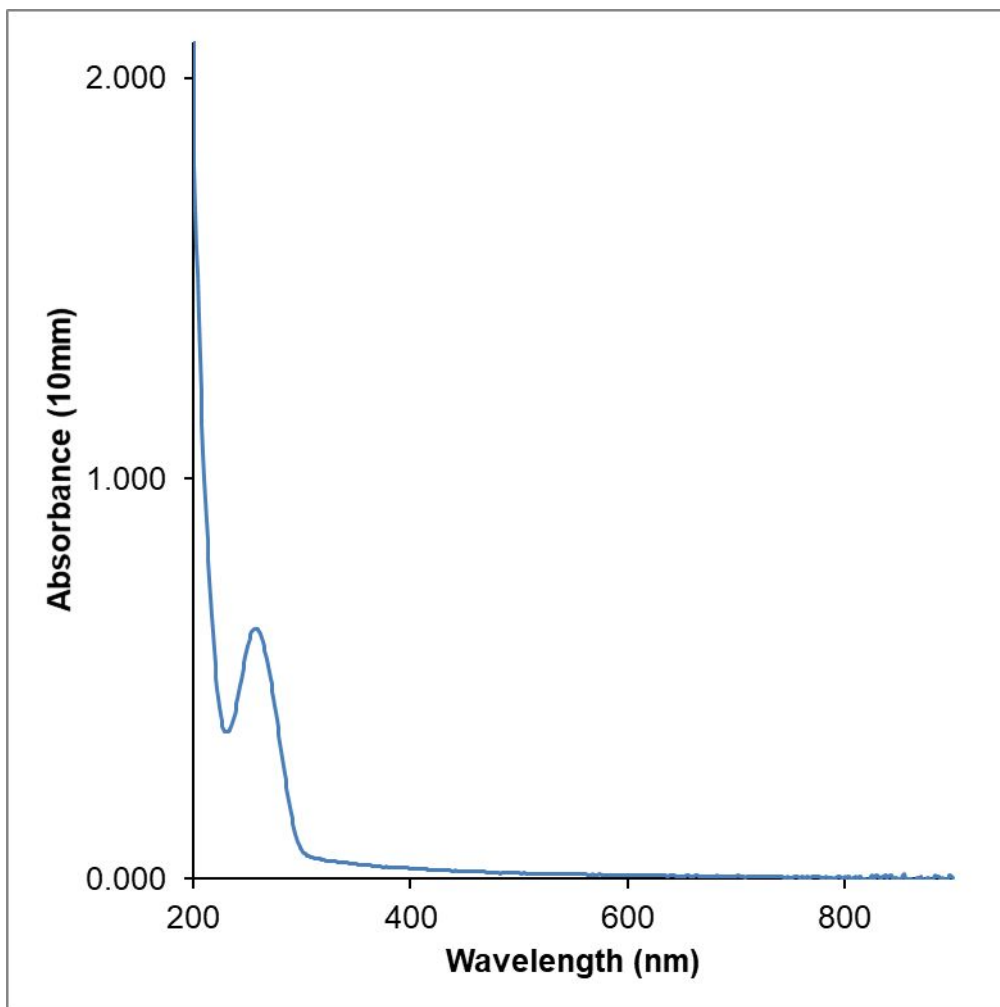

**Supplementary Figure S1. The UV spectra of EPS in the range 200-900 nm.**

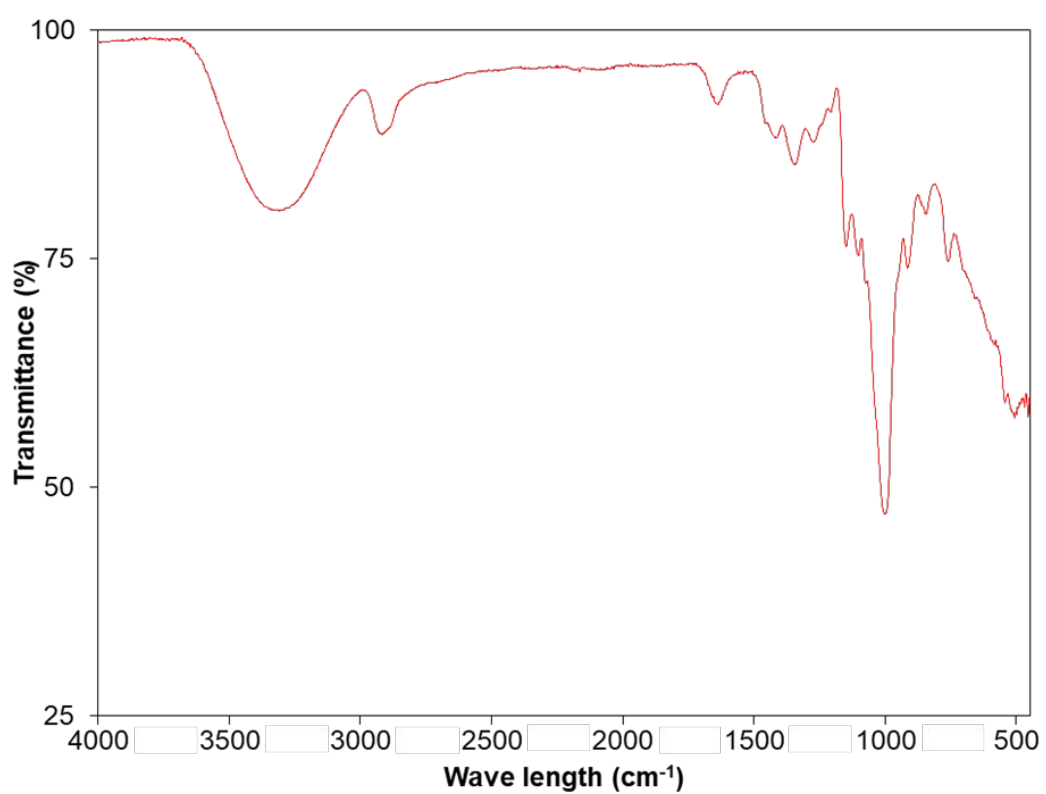

**Supplementary Figure S2. FTIR spectrum of the commercial dextran.**
